# Supplementary material for: Electrocardiographic Abnormalities and Sudden Death in Myotonic Dystrophy Type 1
Source: Atypon-hosted journal article supplement (doi:10.1056/nejmoa062800), 2008-06-18
Supplement: nejm_groh_2688sa1.pdf [file nejm_groh_2688sa1.pdf]

## Supplementary Appendix

This appendix has been provided by the authors to give readers additional information about their work.

Supplement to: Groh WJ, Groh MR, Saha C, et al. Electrocardiographic abnormalities and sudden death in myotonic dystrophy type 1. *N Engl J Med* 2008;358:2688-97.

**Online Appendix.** Characteristics of Patients and Events at Sudden Death.

| Case | Age<br>(years) | Gender | Muscular<br>impairment* | Pacemaker | Implantable<br>defibrillator | Witnessed<br>Collapse | Resuscitation<br>Attempted | Initial Rhythm                                      |
|------|----------------|--------|-------------------------|-----------|------------------------------|-----------------------|----------------------------|-----------------------------------------------------|
| 1    | 39             | Female | 4                       | No        | No                           | Yes                   | Yes                        | VT / VF‡                                            |
| 2    | 38             | Female | 3                       | No        | No                           | No                    | No                         | -                                                   |
| 3    | 62             | Female | 4                       | No        | No                           | No                    | No                         | -                                                   |
| 4    | 38             | Female | 4                       | No        | No                           | No                    | No                         | -                                                   |
| 5    | 48             | Male   | 5                       | No        | No                           | Yes                   | Yes§                       | VT / VF                                             |
| 6    | 33             | Male   | 1,2                     | No        | No                           | Yes                   | Yes                        | VT / VF                                             |
| 7    | 47             | Female | 4                       | No        | No                           | Yes                   | Yes                        | Unknown                                             |
| 8    | 23             | Female | 1,2                     | No        | No                           | Yes                   | Yes                        | Unknown                                             |
| 9    | 48             | Female | 5                       | No        | No                           | No                    | No                         | -                                                   |
| 10   | 54             | Male   | 5                       | No        | No                           | Yes                   | No¶                        | Bradycardia / 3 <sup>rd</sup> degree<br>heart block |
| 11   | 64             | Male   | 5                       | Yes       | No                           | Yes                   | No¶                        | VT / VF                                             |
| 12   | 77             | Male   | 4                       | No        | No                           | No                    | No                         | -                                                   |
| 13   | 45             | Female | 4                       | Yes       | No                           | Yes                   | Yes                        | Asystole (pacing spikes)                            |
| 14   | 55             | Male   | 4                       | Yes       | No                           | Yes                   | Yes                        | VT / VF                                             |
| 15   | 58             | Female | 1,2                     | No        | No                           | Yes                   | Yes                        | VT / VF                                             |

|    |    |        |   |     |     |     |      |                               |
|----|----|--------|---|-----|-----|-----|------|-------------------------------|
| 16 | 40 | Female | 5 | No  | No  | No  | No   | -                             |
| 17 | 45 | Male   | 4 | Yes | No  | Yes | Yes  | Asystole (pacing spikes)      |
| 18 | 76 | Female | 4 | No  | No  | Yes | Yes  | Asystole                      |
| 19 | 51 | Female | 3 | No  | No  | Yes | No¶¶ | -                             |
| 20 | 67 | Female | 3 | No  | No  | Yes | Yes  | Asystole                      |
| 21 | 49 | Female | 5 | No  | No  | Yes | No¶¶ | VT / VF                       |
| 22 | 47 | Male   | 3 | No  | Yes | No  | No   | -                             |
| 23 | 55 | Male   | 3 | Yes | No  | Yes | Yes  | VT / VF                       |
| 24 | 54 | Male   | 3 | No  | Yes | No  | Yes  | Asystole (pacing spikes)†     |
| 25 | 56 | Male   | 3 | No  | No  | No  | Yes  | Pulseless electrical activity |
| 26 | 52 | Male   | 3 | No  | No  | No  | Yes  | Asystole                      |
| 27 | 56 | Male   | 4 | No  | No  | Yes | Yes  | VT / VF                       |

---

\*See text for definition of muscular impairment rating scale. Rating based on findings at last follow-up prior to sudden death.

‡VT / VF denotes a ventricular tachyarrhythmia observed on electrocardiogram monitor either ventricular tachycardia or fibrillation.

§Emergency response, rhythm evaluated, cardiopulmonary resuscitation initiated, and defibrillation with post-defibrillation asystole. Resuscitation then terminated per discussion with spouse based on patient's advance health care directive.

¶Emergency response and rhythm evaluated but no further resuscitation attempted per patients' advance health care directives.

¶¶No emergency response, rhythm evaluation, or resuscitation attempt due to location of witnessed collapse in a foreign country.

†Postmortem implantable cardioverter-defibrillator interrogation was evaluated. Antitachycardia pacing and cardioversion initially for atrial tachyarrhythmias and later defibrillation for ventricular tachyarrhythmias was observed over a period of one hour prior to death. The final event was defibrillation for a rapid ventricular tachyarrhythmia with subsequent asystole despite pacing spikes (rhythm observed by emergency responders).
